# Supplementary material
Source: PubMed Central journal article supplement (PMC3135912)
Supplement: supp_pp.111.175778_175778supplemental_data.pdf [file supp_pp.111.175778_175778supplemental_data.pdf]

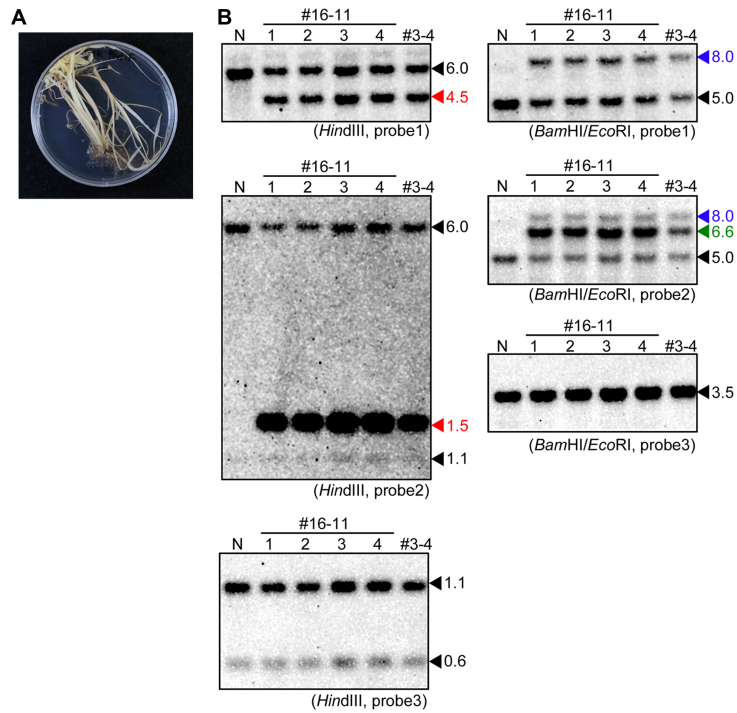

**Supplemental Figure S1.** Molecular analysis of #16-11.

(A) Photograph of a regenerated #16-11 plant. (B) Southern blot analysis of *HindIII*-digested or *BamHI/EcoRV*-digested DNA from four independently regenerated plants of #16-11. Details are shown in Fig.2C, D.

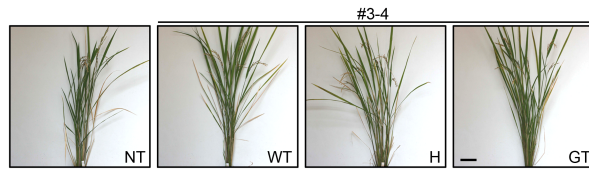

**Supplemental Figure S2.** Growth of #3-4 in the greenhouse.

Photographs of mature plants of non-transformant (NT), wild-type (WT), and homozygous (GT) and heterozygous (H) for modified OASA2. Bar=10 cm.

**Supplementary Table S1** Primers used in this study

| Primer name | Sequence (5'-3')                         |
|-------------|------------------------------------------|
| OASA2 f1    | CCCATCGAGGAAGAGTAAACCCAAAAA              |
| OASA2 f2    | GGAGACGCCAAGCTTCCTCTTCGAGTTCGTCGAGC      |
| OASA2 f3    | TTGTGAACCCAAGTCCAGCCATGGCATATGTACAGGTAT  |
| OASA2 f4    | GCCTTGGAGGGATTTCATTTGACGGAGACATGGACATCGC |
| OASA2 f5    | ATGGACTTGTTTACTCGGGAGTGGTTG              |
| OASA2 f6    | GCGTGAGGTACCCCGCGGGGAAG                  |
| OASA2 f7    | CTTGCTGCAAATGTGAGACCGTGAGTTA             |
| OASA2 f8    | TTGGTGTGTTGAGCCTTGCTTTTGTCT              |
| OASA2 r1    | TAAACATGCAGCGAGAAGAACCATGAA              |
| OASA2 r2    | GCTCGACGAACTCGAAGAGGAAGCTTGGCGTCTCC      |
| OASA2 r3    | ATACCTGTACATATGCCATGGCTGGACTTGGGTTCACAA  |
| OASA2 r4    | GCGATGTCCATGTCTCCGTCAAATGAAATCCCTCCAAGGC |
| OASA2 r5    | TCCCAACCTCTCATCTCTCATTTTTCG              |
| OASA2 r6    | GGGCTTAGGGGTCCTGTTGGAAACTAT              |
| OASA2 r7    | GATCACCGCGCTTGCCTCTG                     |
| OASA2 r8    | GTTCGCCTCTCAAACCTCTGGCTTAAAA             |
| OASA2 r9    | CTAGGCCATGCGTCTGAACTTGTCTCC              |
| OASA2 RT-f  | TGATGTTACCTTGGGCTTT                      |
| OASA2 RT-r  | ATGCCGATCAAGATTTACCC                     |
| OsAct1 RT-f | AGGCCAATCGTGAGAAGATGACCCA                |
| OsAct1 RT-r | GTGTGGCTGACACCATCACCAGAG                 |
